# Supplementary material
Source: MDPI journal article supplement (https://www.mdpi.com/2076-3263/13/2/38)
Supplement: s1 [file s1]

## Hydrogeochemical Characteristics and Isotopic Tools Used to Identify the Mineralization Processes of the Bottled Mineral Water in Morocco

**Table S1.** Date of production and analysis of the different types of water

| Water Type       | Name                       | Production date | Date of analysis |
|------------------|----------------------------|-----------------|------------------|
| EM <sub>1</sub>  | Ain Saiss                  | 11-01-2018      | 21-03-2018       |
|                  |                            | 13-09-2019      | 27-11-2019       |
|                  |                            | 17-01-2020      | 15-03-2020       |
| EM <sub>2</sub>  | Sidi Ali                   | 13-01-2018      | 21-03-2018       |
|                  |                            | 15-08-2019      | 27-11-2019       |
|                  |                            | 06-01-2020      | 15-03-2020       |
| EM <sub>3</sub>  | Sidi Harazem               | 15-01-2018      | 21-03-2018       |
|                  |                            | 11-09-2019      | 27-11-2019       |
|                  |                            | 04-01-2020      |                  |
| EM <sub>4</sub>  | Ain Atlas                  | 12-01-2018      | 21-03-2018       |
|                  |                            | 15-09-2019      | 27-11-2019       |
|                  |                            | 03-01-2020      | 15-03-2020       |
| EM <sub>5</sub>  | Ain Ifrane                 | 08-01-2018      | 21-03-2018       |
|                  |                            | 28-09-2019      | 27-11-2019       |
|                  |                            | 21-01-2020      | 15-03-2020       |
| EM <sub>6</sub>  | Ain Sultane                | 26-01-2018      | 21-03-2018       |
|                  |                            | 07-09-2019      | 27-11-2019       |
|                  |                            | 29-01-2020      | 15-03-2020       |
| EM <sub>7</sub>  | Chaouen                    | 19-12-2017      | 21-03-2018       |
|                  |                            | 05-09-2019      | 27-11-2019       |
|                  |                            | 13-01-2020      | 15-03-2020       |
| EM <sub>G</sub>  | Oulmes                     | 15-01-2018      | 21-03-2018       |
|                  |                            | 03-10-2019      | 27-11-2019       |
|                  |                            | 17-01-2020      | 15-03-2020       |
| EM <sub>GF</sub> | Ain Saiss Finely sparkling | 04-12-2017      | 21-03-2018       |
|                  |                            | 23-09-2019      | 27-11-2019       |
|                  |                            | 06-01-2020      | 15-03-2020       |
| EM <sub>GL</sub> | Oulmes Light               | 18-01-2018      | 21-03-2018       |
|                  |                            | 04-09-2019      | 27-11-2019       |
|                  |                            | 09-01-2020      | 15-03-2020       |
| ES               | Rif                        | 17-12-2017      | 21-03-2018       |
|                  |                            | 25-09-2019      | 27-11-2019       |
|                  |                            | 29-01-2020      | 15-03-2020       |
